# Supplementary material
Source: PubMed Central journal article supplement (PMC3264387)
Supplement: supp_86.3.1623_FigS1.pdf [file supp_86.3.1623_FigS1.pdf]

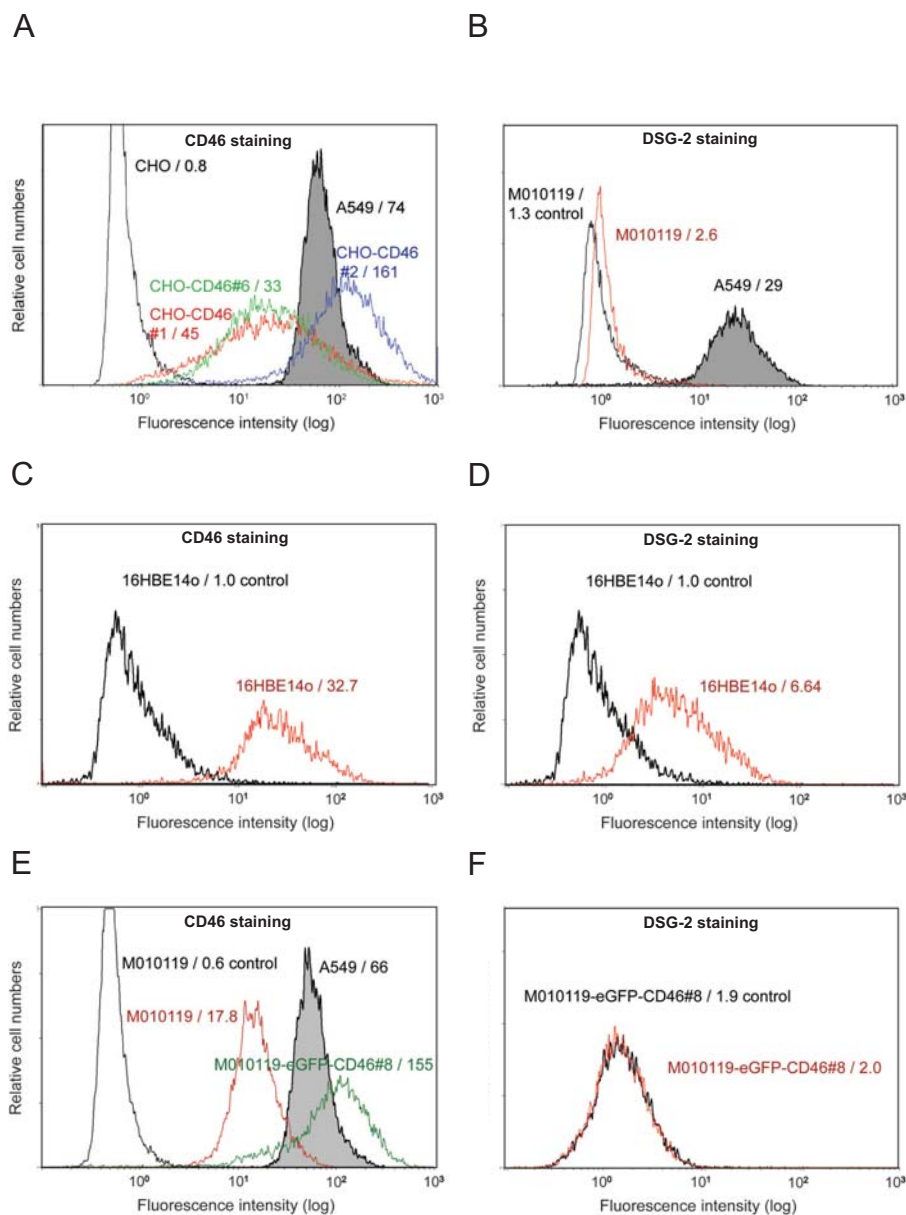

sFig. 1. Flow cytometry profiles of CD46 and DSG-2 expression. CD46 was analyzed in A549 human lung cells, parental rodent CHO and three different stable and clonal CHO-CD46 transfectants with increasing CD46 levels (A), in human 16HBE14o bronchial epithelial cells (C), or in parental M010119 and stable transfected M010119-eGFP-CD46#8 cells (E). Numbers after slash indicate MFI values resulting from utilizing the MCI20.6 anti-CD46 antibody (A), or GB24 anti-CD46 (stains both, endogenous and eGFP-tagged CD46) (E). Controls using isotype antibody were in the range from 0.8 to 1 (not shown). DSG-2 was analyzed in A549 cells and in parental M010119 cells (B), in 16HBE14o cells (D) and stable transfected M010119-eGFP-CD46#8 cells (F) with 6D8 anti-DSG-2 antibody.
