# Supplementary material
Source: PubMed Central journal article supplement (PMC3264387)
Supplement: supp_86.3.1623_FigS2.pdf [file supp_86.3.1623_FigS2.pdf]

A

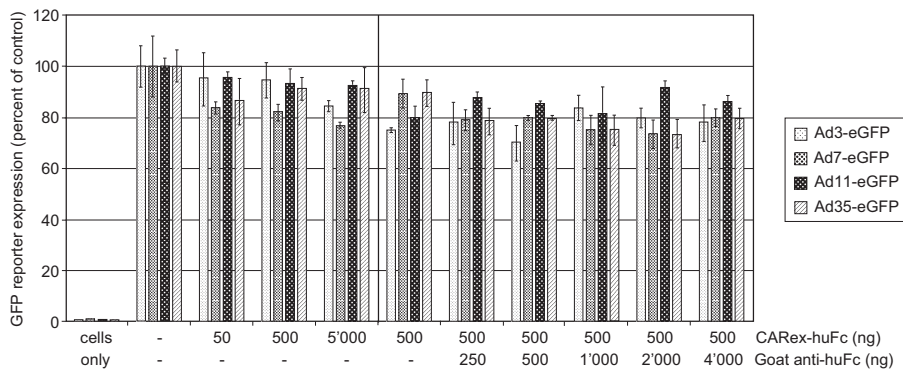

B

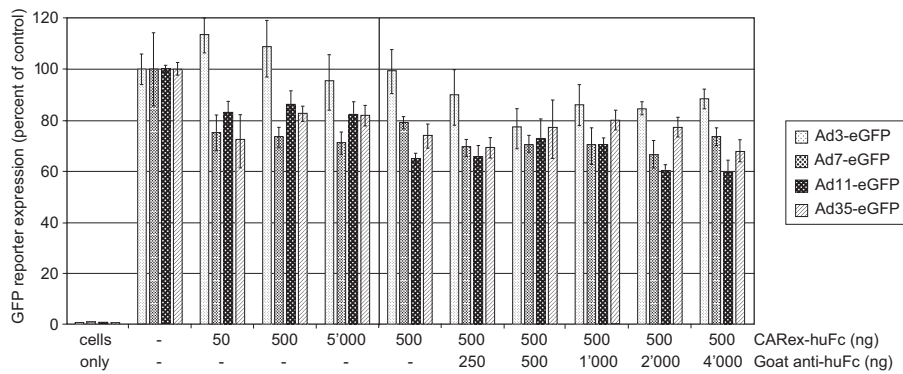

sFig. 2. Control for cross-linking experiment shown in Fig. 3 with CARex-huFc replacing CD46ex-huFc. (A) CHO-CD46#2 cells or (B) A549 cells were pre-incubated for 1 h in the cold using the indicated concentrations of adapter CARex-huFc alone or in combination with a 2-fold increase series of goat-anti human Fc antibody. Following addition of the different eGFP-expressing vectors for another 1 h, cells were washed and analyzed 48 h p.i.
