# Supplementary material
Source: PubMed Central journal article supplement (PMC3264387)
Supplement: supp_86.3.1623_FigS3.pdf [file supp_86.3.1623_FigS3.pdf]

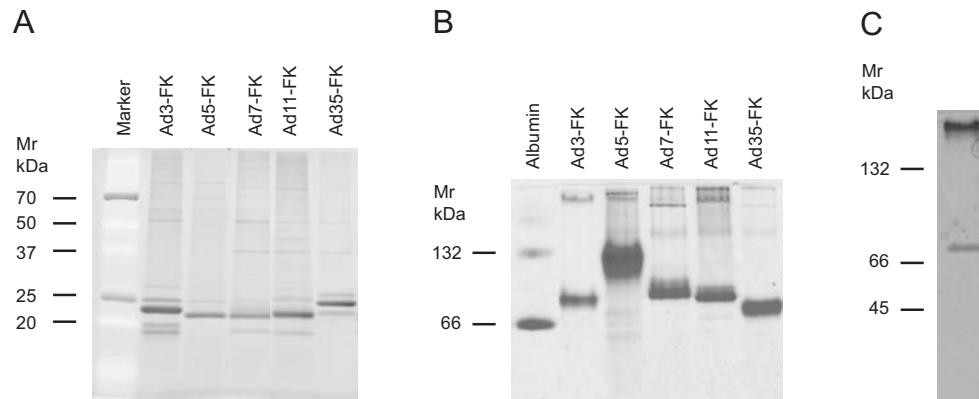

sFig. 3. Analysis of recombinant Ad-FK and CD46ex-Fc proteins. (A, B) Individual FK proteins were produced using the Baculovirus expression system. Purified FK proteins from Ad3, Ad5, Ad7, Ad11, and Ad35 were analyzed by either 12.5% reducing PAGE and sypro ruby red staining (A), or by 10% native PAGE and Coomassie Blue staining (B). (C) Analysis of recombinant CD46ex-huFc. Three  $\mu$ g of purified CD46ex-huFc were analyzed by 10% native PAGE and Coomassie Blue staining.
