# Supplementary material
Source: PubMed Central journal article supplement (PMC3264387)
Supplement: supp_86.3.1623_JVI06181-11R1_supp_file_1_legends.pdf [file supp_86.3.1623_JVI06181-11R1_supp_file_1_legends.pdf]

## 1 Supplemental Data

## 2 Supplemental Methods

### 3 Kinetic/affinity analysis and fitting procedure for SPR

4 Kinetic/affinity analysis of FK binding to immobilized CD46 was performed using  
5 three models in combination with the Biacore T100 evaluation software version 2.0.3.  
6 A first included a 1:1 fitting model provided by the Biacore T100 evaluation software  
7 itself, which failed to describe the obtained binding data satisfyingly. Second, two  
8 trivalent models were tested and included the equations described by Lortat-Jacob *et*  
9 *al.* (2) and a variation of the equations described by Fournel *et al.* (1) (Johan  
10 Hoebeke, personal communication). Both trivalent models resulted in reasonable  
11 good fitting for Ad11- and 35-FK to immobilized CD46 judged by  $\chi^2$  values, but they  
12 showed relatively large errors for Ad3- and Ad7-FK binding kinetics. Third, a two-  
13 stage reaction model was applied to globally fit the binding data, which provided the  
14 lowest  $\chi^2$  values for all four FK binding reactions. In this model, analyte (A) binds to  
15 ligand (B) to form the complex AB, then complex AB changes to ABx, which cannot  
16 dissociate directly to A+B. The net reactions are described by equations 1–6, where  
17  $\sigma_{kd1}$ ,  $\sigma_{kd2}$ ,  $\sigma_{ka1}$ , and  $\sigma_{ka2}$  are standard deviation for individual  $k_{d1}$ ,  $k_{d2}$ ,  $k_{a1}$ , and  $k_{a2}$ ,  
18 respectively.  $\sigma_{KD}$  is the standard deviation for overall  $K_D$ .

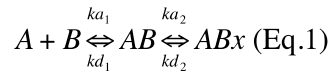

$$A = conc$$

$$B[0] = R_{max}, \frac{dB}{dt} = -(ka_1 * A * B - kd_1 * AB) \text{ (Eq.2)}$$

$$AB[0] = 0, \frac{dAB}{dt} = (ka_1 * A * B - kd_1 * AB) - (ka_2 * AB - kd_2 * ABx) \text{ (Eq.3)}$$

19  $ABx[0] = 0, \frac{dABx}{dt} = (ka_2 * AB - kd_2 * ABx) \text{ (Eq.4)}$

$$\text{Total response : } AB + ABx + RI$$

$$KD = \frac{kd_1}{ka_1} \frac{kd_2}{kd_2 + ka_2} \text{ (Eq.5)}$$

$$\sigma_{KD} = \sqrt{\left(\frac{kd_2}{ka_1(kd_2 + ka_2)} \sigma_{kd_1}\right)^2 + \left(\frac{kd_1(kd_2 + ka_2) - kd_1kd_2}{ka_1(kd_2 + ka_2)^2} \sigma_{kd_2}\right)^2} \\ + \left(\frac{kd_1kd_2}{ka_1^2(kd_2 + ka_2)} \sigma_{ka_1}\right)^2 + \left(\frac{kd_1kd_2}{ka_1(kd_2 + ka_2)} \sigma_{ka_2}\right)^2 \text{ (Eq.6)}$$

20

21 **Legends to supplemental figures**

22

23 **SFig. 1.** Flow cytometry profiles of CD46 and DSG-2 expression. CD46 was  
24 analyzed in A549 human lung cells, parental rodent CHO and three different stable  
25 and clonal CHO-CD46 transfectants with increasing CD46 levels (A), in human  
26 16HBE14o bronchial epithelial cells (C), or in parental M010119 and stable  
27 transfected M010119-eGFP-CD46#8 cells (E). Numbers after slash indicate MFI  
28 values resulting from utilizing the MCI20.6 anti-CD46 antibody (A, C), or GB24 anti-  
29 CD46 (stains both, endogenous and eGFP-tagged CD46) (E). Controls using isotype  
30 antibody were in the range from 0.8 to 1 (not shown). DSG-2 was analyzed in A549  
31 cells and in parental M010119 cells (B), in 16HBE14o cells (D) and stable transfected  
32 M010119-eGFP-CD46#8 cells (F) with 6D8 anti-DSG-2 antibody.

33

34 **SFig. 2.** Control for cross-linking experiment shown in Fig. 3 with CAREx-huFc  
35 replacing CD46ex-huFc. (A) CHO-CD46#2 cells or (B) A549 cells were pre-  
36 incubated for 1 h in the cold using the indicated concentrations of adapter CAREx-  
37 huFc alone or in combination with a 2-fold increase series of goat-anti human Fc  
38 antibody. Following addition of the different eGFP-expressing vectors for another  
39 1 h, cells were washed and analyzed 48 h p.i.

40

41 **SFig. 3.** Analysis of recombinant Ad-FK and CD46ex-huFc proteins. (A, B)  
42 Individual FK proteins were produced using the Baculovirus expression system.  
43 Purified FK proteins from Ad3, Ad5, Ad7, Ad11, and Ad35 were analyzed by either  
44 12.5% reducing PAGE and sypro ruby red staining (A), or by 10% native PAGE and  
45 Coomassie Blue staining (B). (C) Analysis of recombinant CD46ex-huFc. Three  $\mu$ g  
46 of purified CD46ex-huFc were analyzed by 10% native PAGE and Coomassie Blue  
47 staining.

48

49 STable 1. Overview kinetics/affinity analysis of Ad-FKs binding to immobilized CD46ex-huFc

| Annalyte / RU chip / binding experiment | Flow rate (ul / min) | $k_{a1}$ ( $M^{-1}s^{-1}$ ) <sup>a</sup> | $k_{d1}$ ( $s^{-1}$ )         | $k_{a2}$ ( $s^{-1}$ )          | $k_{d2}$ ( $s^{-1}$ )          | % $\chi^2/R_{max}$ | $K_D$ (M)                       |
|-----------------------------------------|----------------------|------------------------------------------|-------------------------------|--------------------------------|--------------------------------|--------------------|---------------------------------|
| Ad3-FK / 1121 / 1                       | 55                   | $2.04 \times 10^5$ (0.0014)              | $7.11 \times 10^{-4}$ (0.019) | $1.97 \times 10^{-3}$ (0.0037) | $1.64 \times 10^{-4}$ (0.0022) | 0.64 - 1.31        | $2.68 \times 10^{-10}$ (0.0093) |
| Ad3-FK / 1121 / 2                       | 30                   | $1.92 \times 10^5$ (0.0013)              | $7.18 \times 10^{-4}$ (0.020) | $2.03 \times 10^{-3}$ (0.0037) | $1.65 \times 10^{-4}$ (0.0022) | 0.66 - 1.28        | $2.81 \times 10^{-10}$ (0.0101) |
| Ad3-FK / 2630 / 3                       | 30                   | $2.93 \times 10^5$ (0.0035)              | $6.36 \times 10^{-4}$ (0.019) | $2.02 \times 10^{-3}$ (0.0046) | $1.98 \times 10^{-4}$ (0.0029) | 1.36 - 2.78        | $1.94 \times 10^{-10}$ (0.0079) |
| Ad7-FK / 1121 / 4                       | 30                   | $4.20 \times 10^4$ (0.012)               | $3.39 \times 10^{-4}$ (0.059) | $3.77 \times 10^{-3}$ (0.036)  | $5.08 \times 10^{-5}$ (0.061)  | 0.03 - 0.50        | $1.07 \times 10^{-10}$ (0.0249) |
| Ad7-FK / 2630 / 5                       | 30                   | $2.44 \times 10^5$ (0.0047)              | $5.88 \times 10^{-4}$ (0.015) | $1.18 \times 10^{-3}$ (0.0035) | $2.58 \times 10^{-4}$ (0.0064) | 0.44 - 0.93        | $4.32 \times 10^{-10}$ (0.0195) |
| Ad7-FK / 2630 / 6                       | 30                   | $1.44 \times 10^5$ (0.0046)              | $3.30 \times 10^{-4}$ (0.011) | $8.67 \times 10^{-4}$ (0.048)  | $2.90 \times 10^{-4}$ (0.015)  | 0.25 - 0.71        | $5.72 \times 10^{-10}$ (0.0419) |
| Ad11-FK / 1121 / 7                      | 30                   | $9.04 \times 10^5$ (0.021)               | $9.86 \times 10^{-5}$ (0.091) | $6.96 \times 10^{-4}$ (0.11)   | $7.57 \times 10^{-5}$ (0.39)   | 2.86 - 5.05        | $1.07 \times 10^{-11}$ (0.0531) |
| Ad11-FK / 2630 / 8                      | 30                   | $7.96 \times 10^5$ (0.012)               | $3.93 \times 10^{-4}$ (0.018) | $1.03 \times 10^{-3}$ (0.0054) | $1.28 \times 10^{-4}$ (0.01)   | 0.27 - 3.72        | $5.47 \times 10^{-11}$ (0.0527) |
| Ad11-FK / 2630 / 9                      | 30                   | $1.08 \times 10^6$ (0.00086)             | $4.90 \times 10^{-4}$ (0.032) | $1.45 \times 10^{-2}$ (0.023)  | $2.77 \times 10^{-4}$ (0.046)  | 3.52 - 4.19        | $8.48 \times 10^{-12}$ (0.199)  |
| Ad35-FK / 1121 / 10                     | 30                   | $3.54 \times 10^6$ (0.0088)              | $2.16 \times 10^{-4}$ (0.015) | $1.12 \times 10^{-3}$ (0.0081) | $1.06 \times 10^{-4}$ (0.0037) | 0.12 - 3.03        | $5.23 \times 10^{-12}$ (0.0751) |
| Ad35-FK / 2630 / 11                     | 30                   | $2.12 \times 10^6$ (0.0034)              | $7.96 \times 10^{-4}$ (0.030) | $1.33 \times 10^{-3}$ (0.0042) | $1.51 \times 10^{-4}$ (0.0049) | 0.27 - 3.08        | $3.85 \times 10^{-11}$ (0.0222) |
| Ad35-FK / 2630 / 12                     | 30                   | $3.60 \times 10^6$ (0.0057)              | $3.85 \times 10^{-4}$ (0.019) | $1.30 \times 10^{-3}$ (0.0061) | $1.31 \times 10^{-4}$ (0.0076) | 0.16 - 4.76        | $9.76 \times 10^{-12}$ (0.0833) |

50

51 <sup>a</sup> values in parentheses are errors of the fitting procedure

52

53 **References**

- 54 1. **Fournel, S., S. Wieckowski, W. Sun, N. Trouche, H. Dumortier, A. Bianco,**  
55 **O. Chaloin, M. Habib, J. C. Peter, P. Schneider, B. Vray, R. E. Toes, R.**  
56 **Offringa, C. J. Melief, J. Hoebeke, and G. Guichard.** 2005. C3-symmetric  
57 peptide scaffolds are functional mimetics of trimeric CD40L. *Nat Chem Biol*  
58 **1:377-82.**
- 59 2. **Lortat-Jacob, H., E. Chouin, S. Cusack, and M. J. van Raaij.** 2001. Kinetic  
60 analysis of adenovirus fiber binding to its receptor reveals an avidity  
61 mechanism for trimeric receptor-ligand interactions. *J Biol Chem* **276:9009-15.**  
62  
63
